# Supplementary material for: Escape from X-inactivation in twins exhibits intra- and inter-individual variability across tissues and is heritable
Source: PLOS journal article supplement (doi:10.1371/journal.pgen.1010556), 2023-02-21
Supplement: S11 (10.1371/journal.pgen.1010556.s011) [file journal.pgen.1010556.s011]

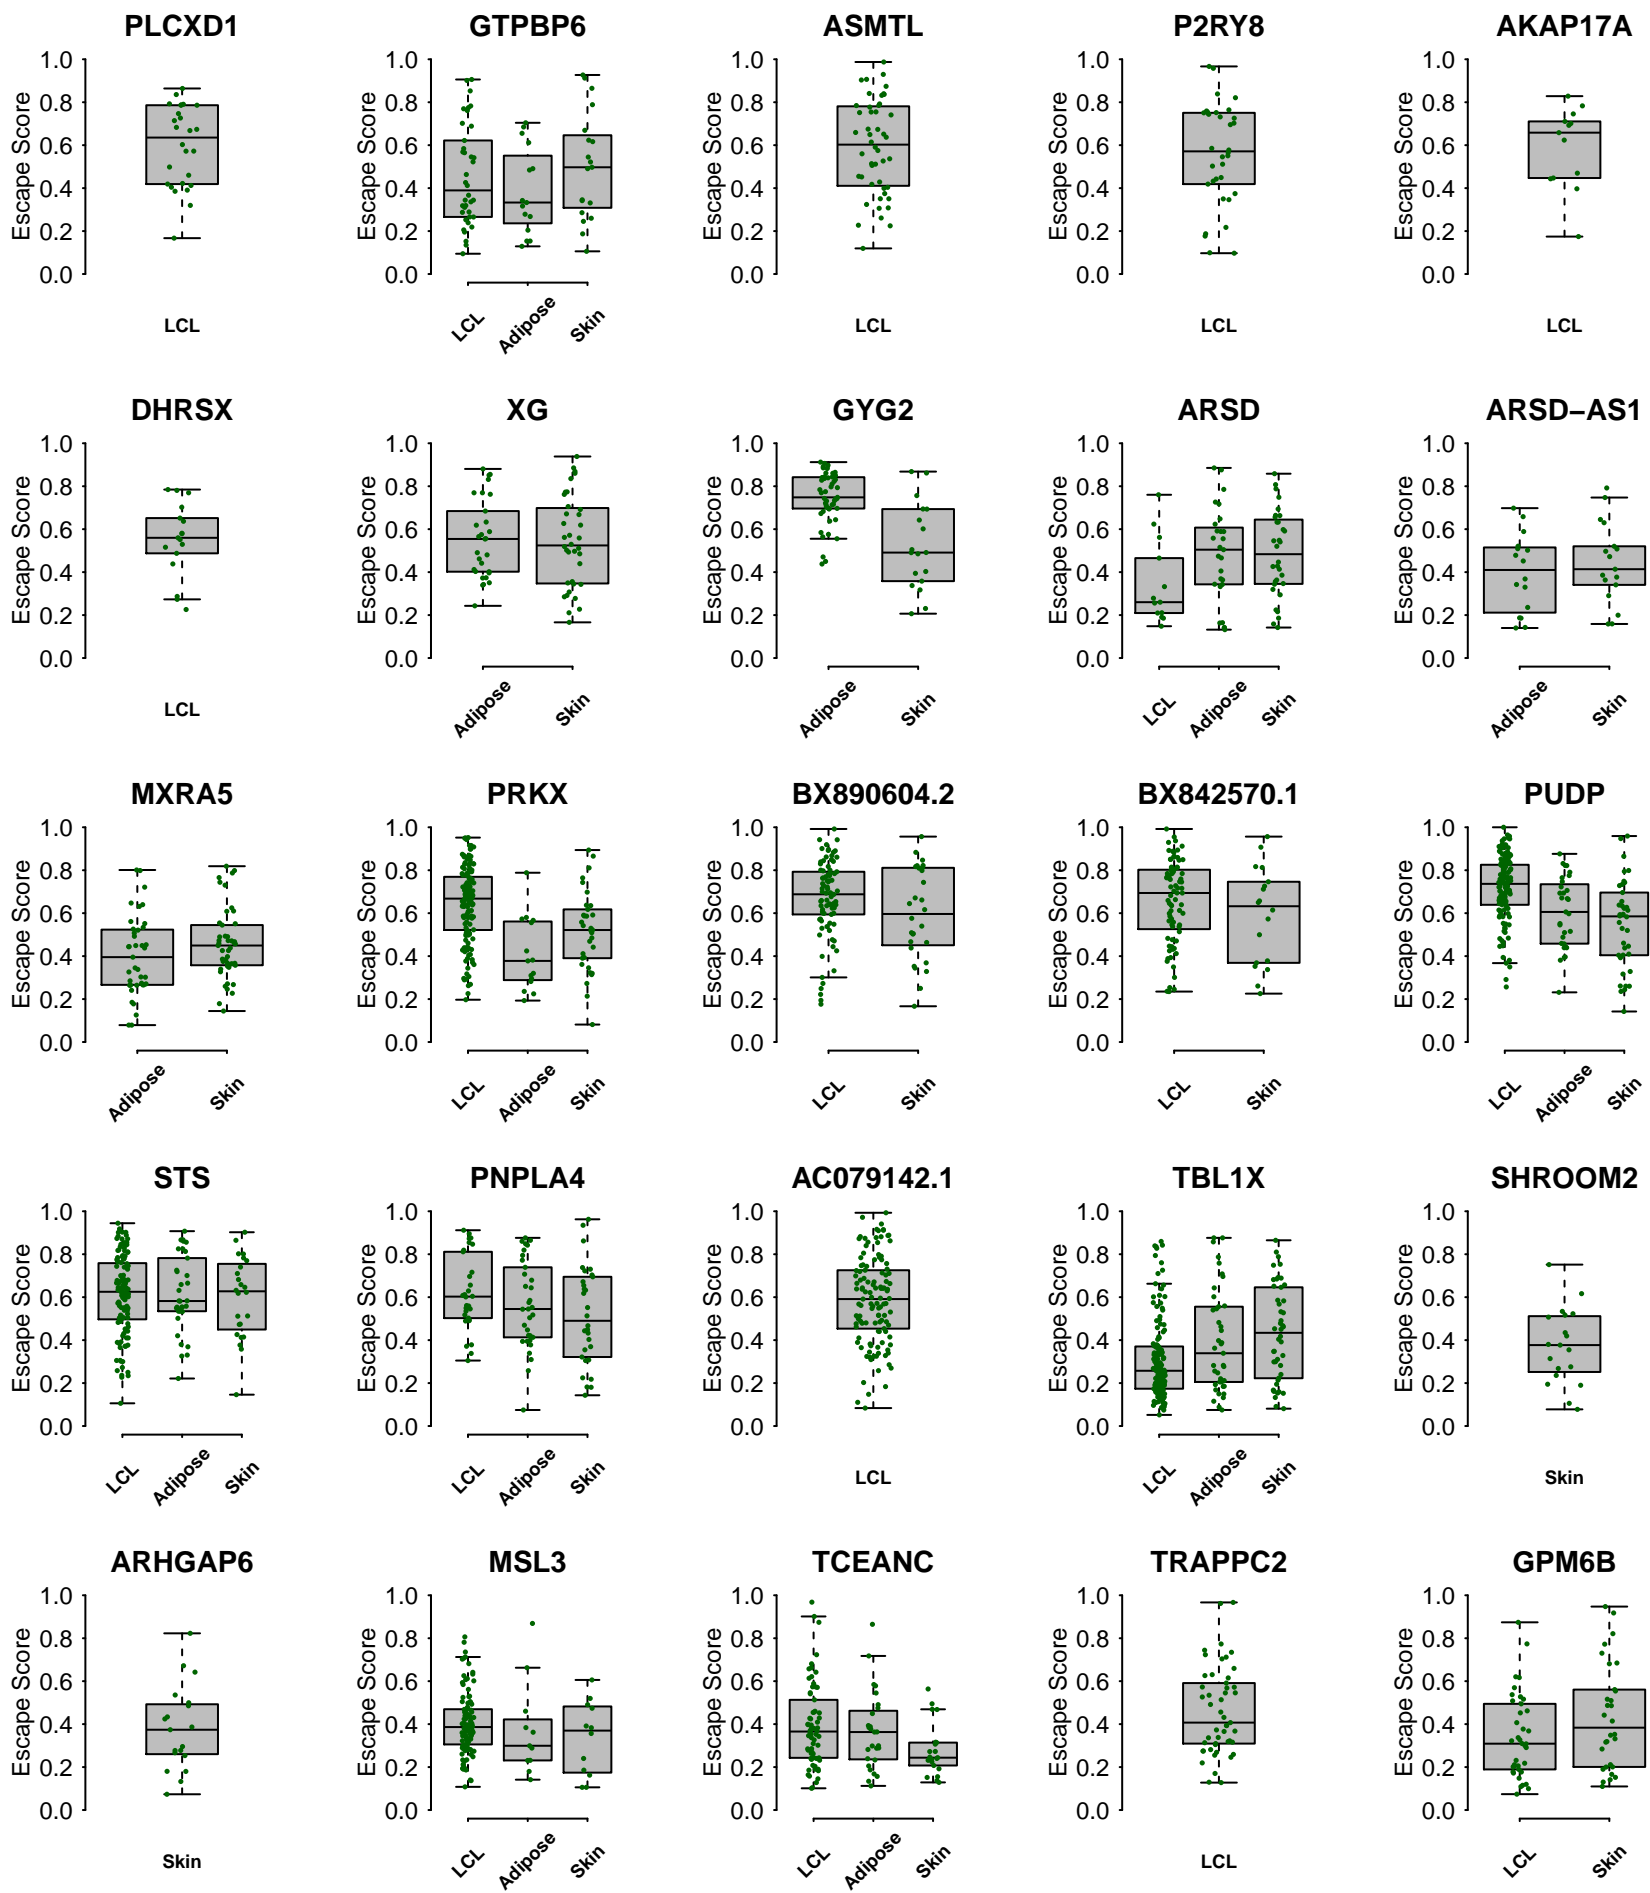

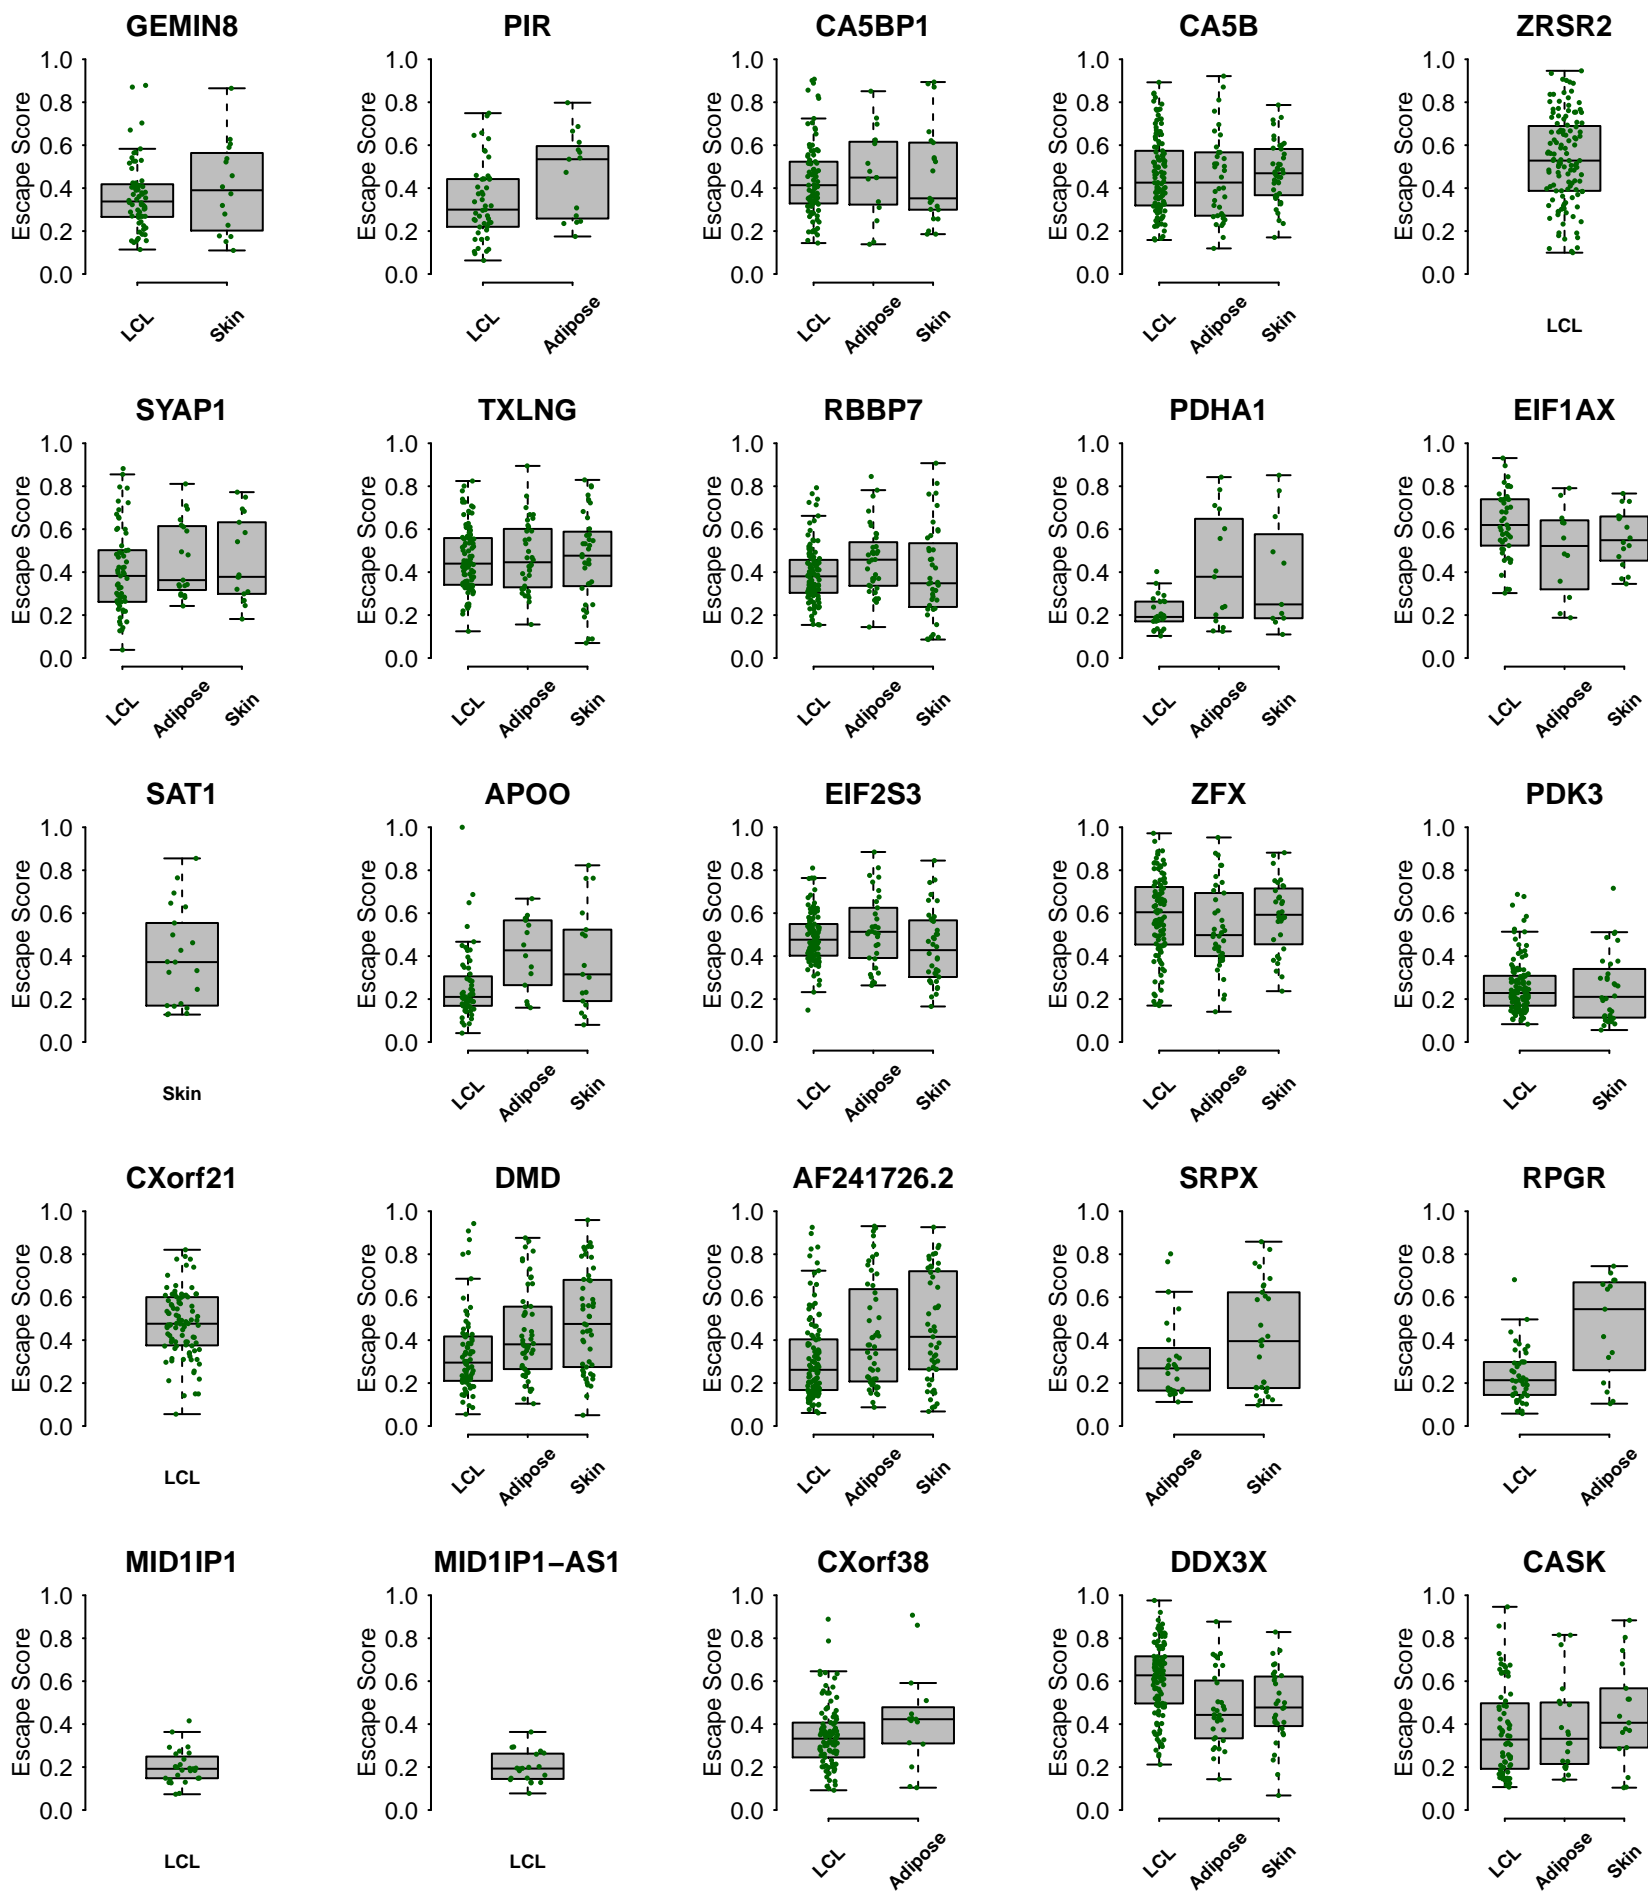

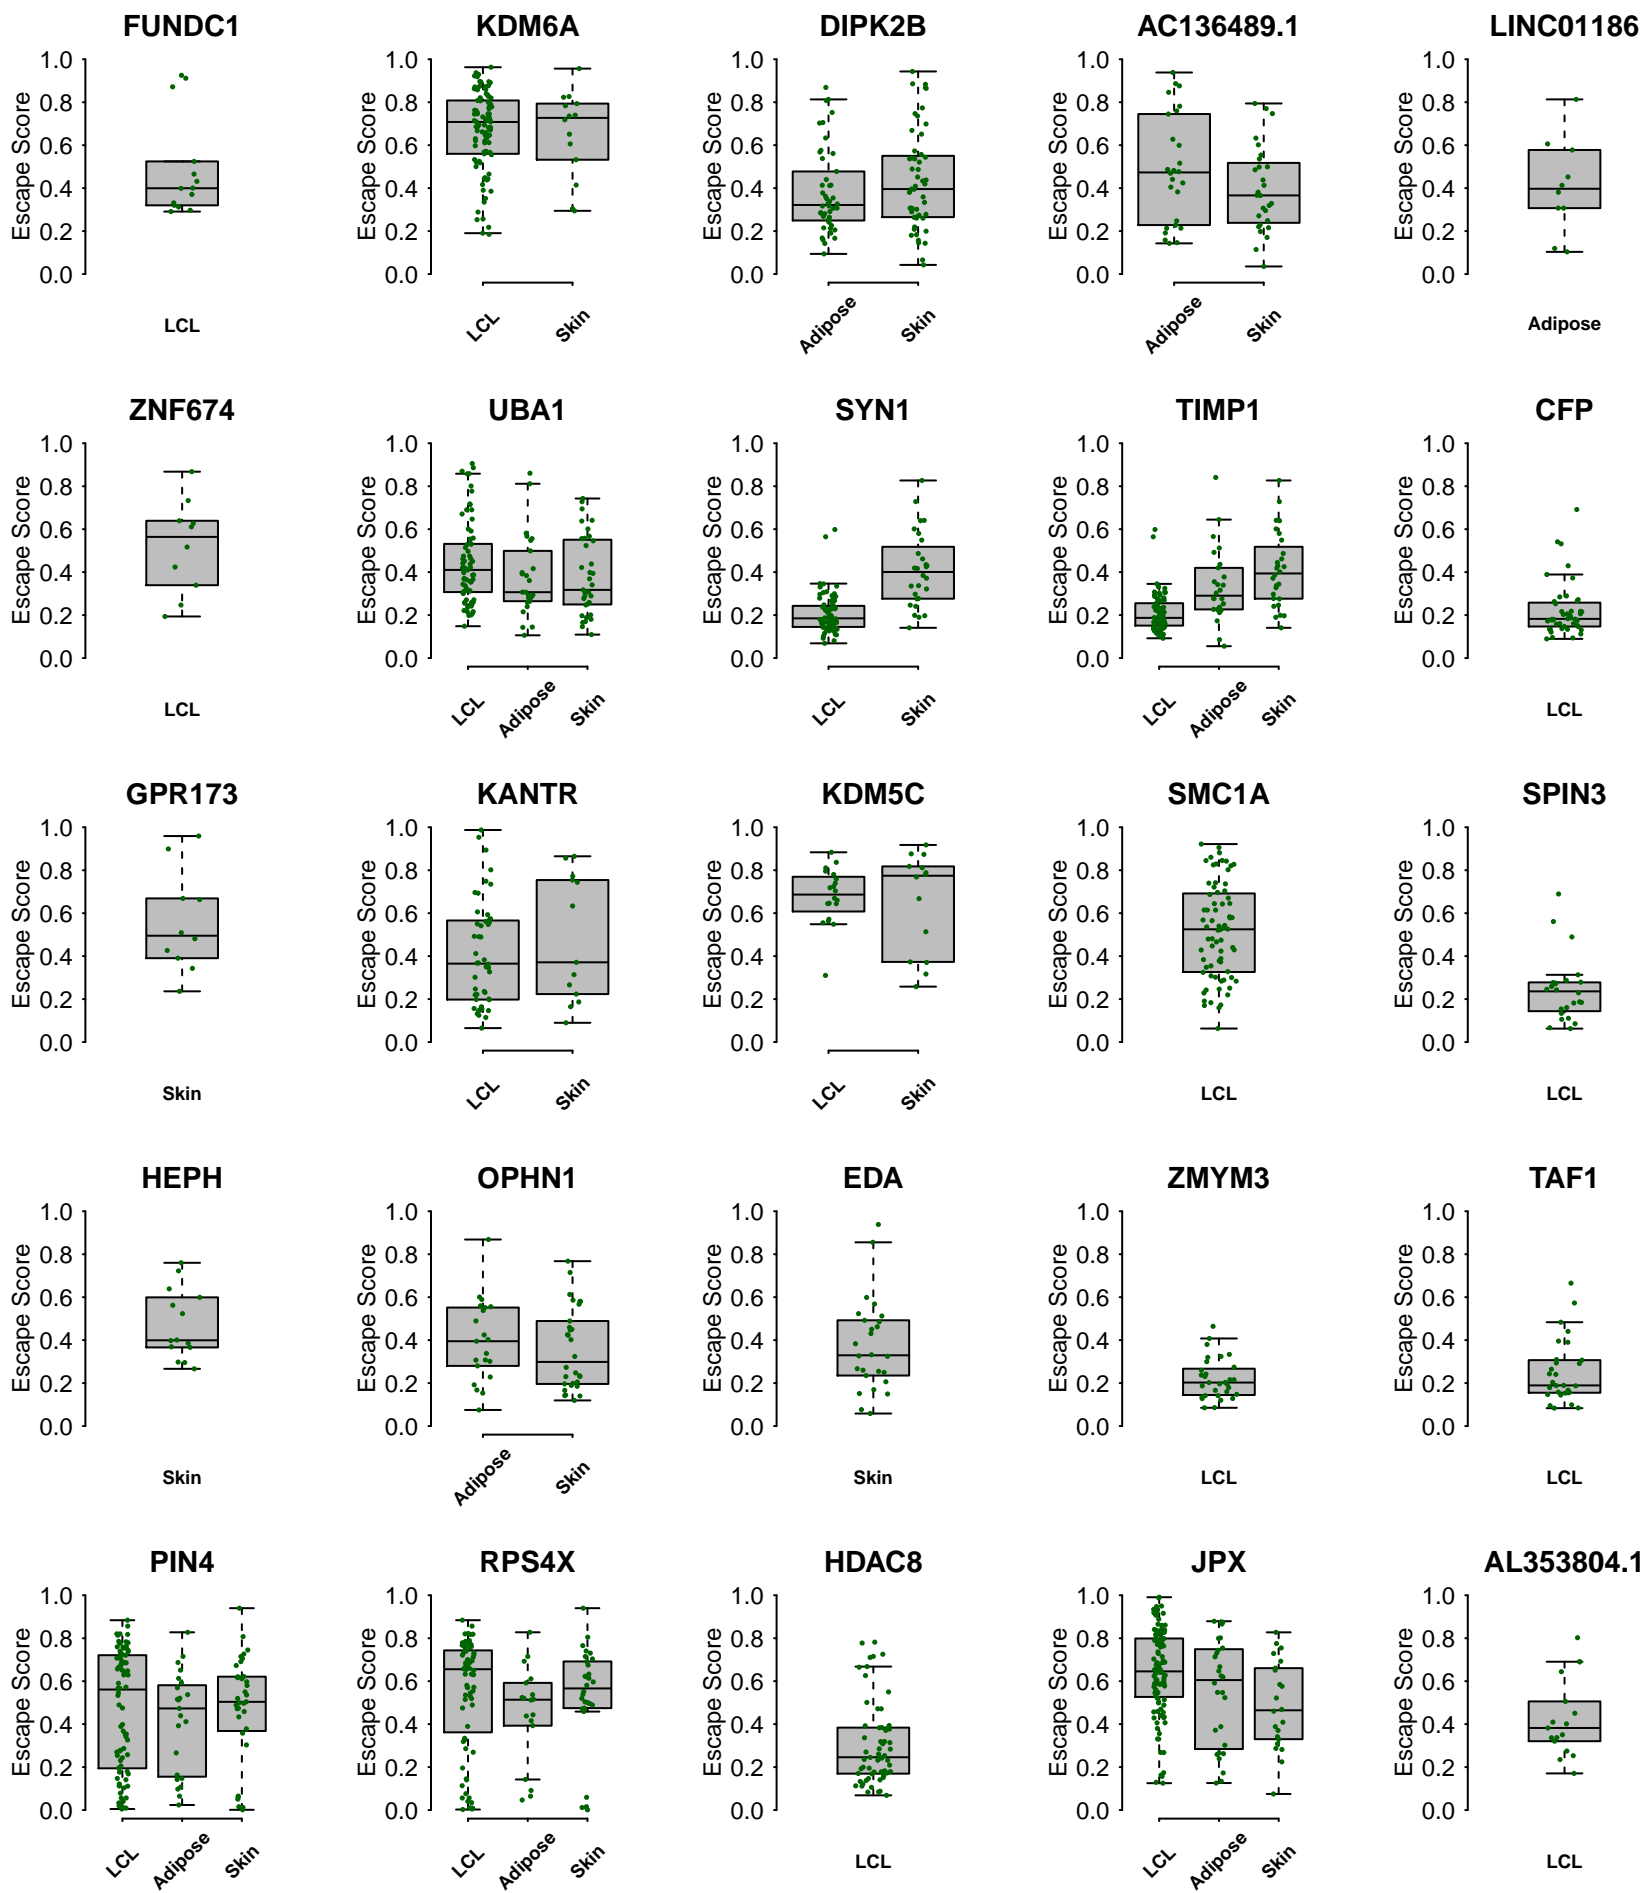

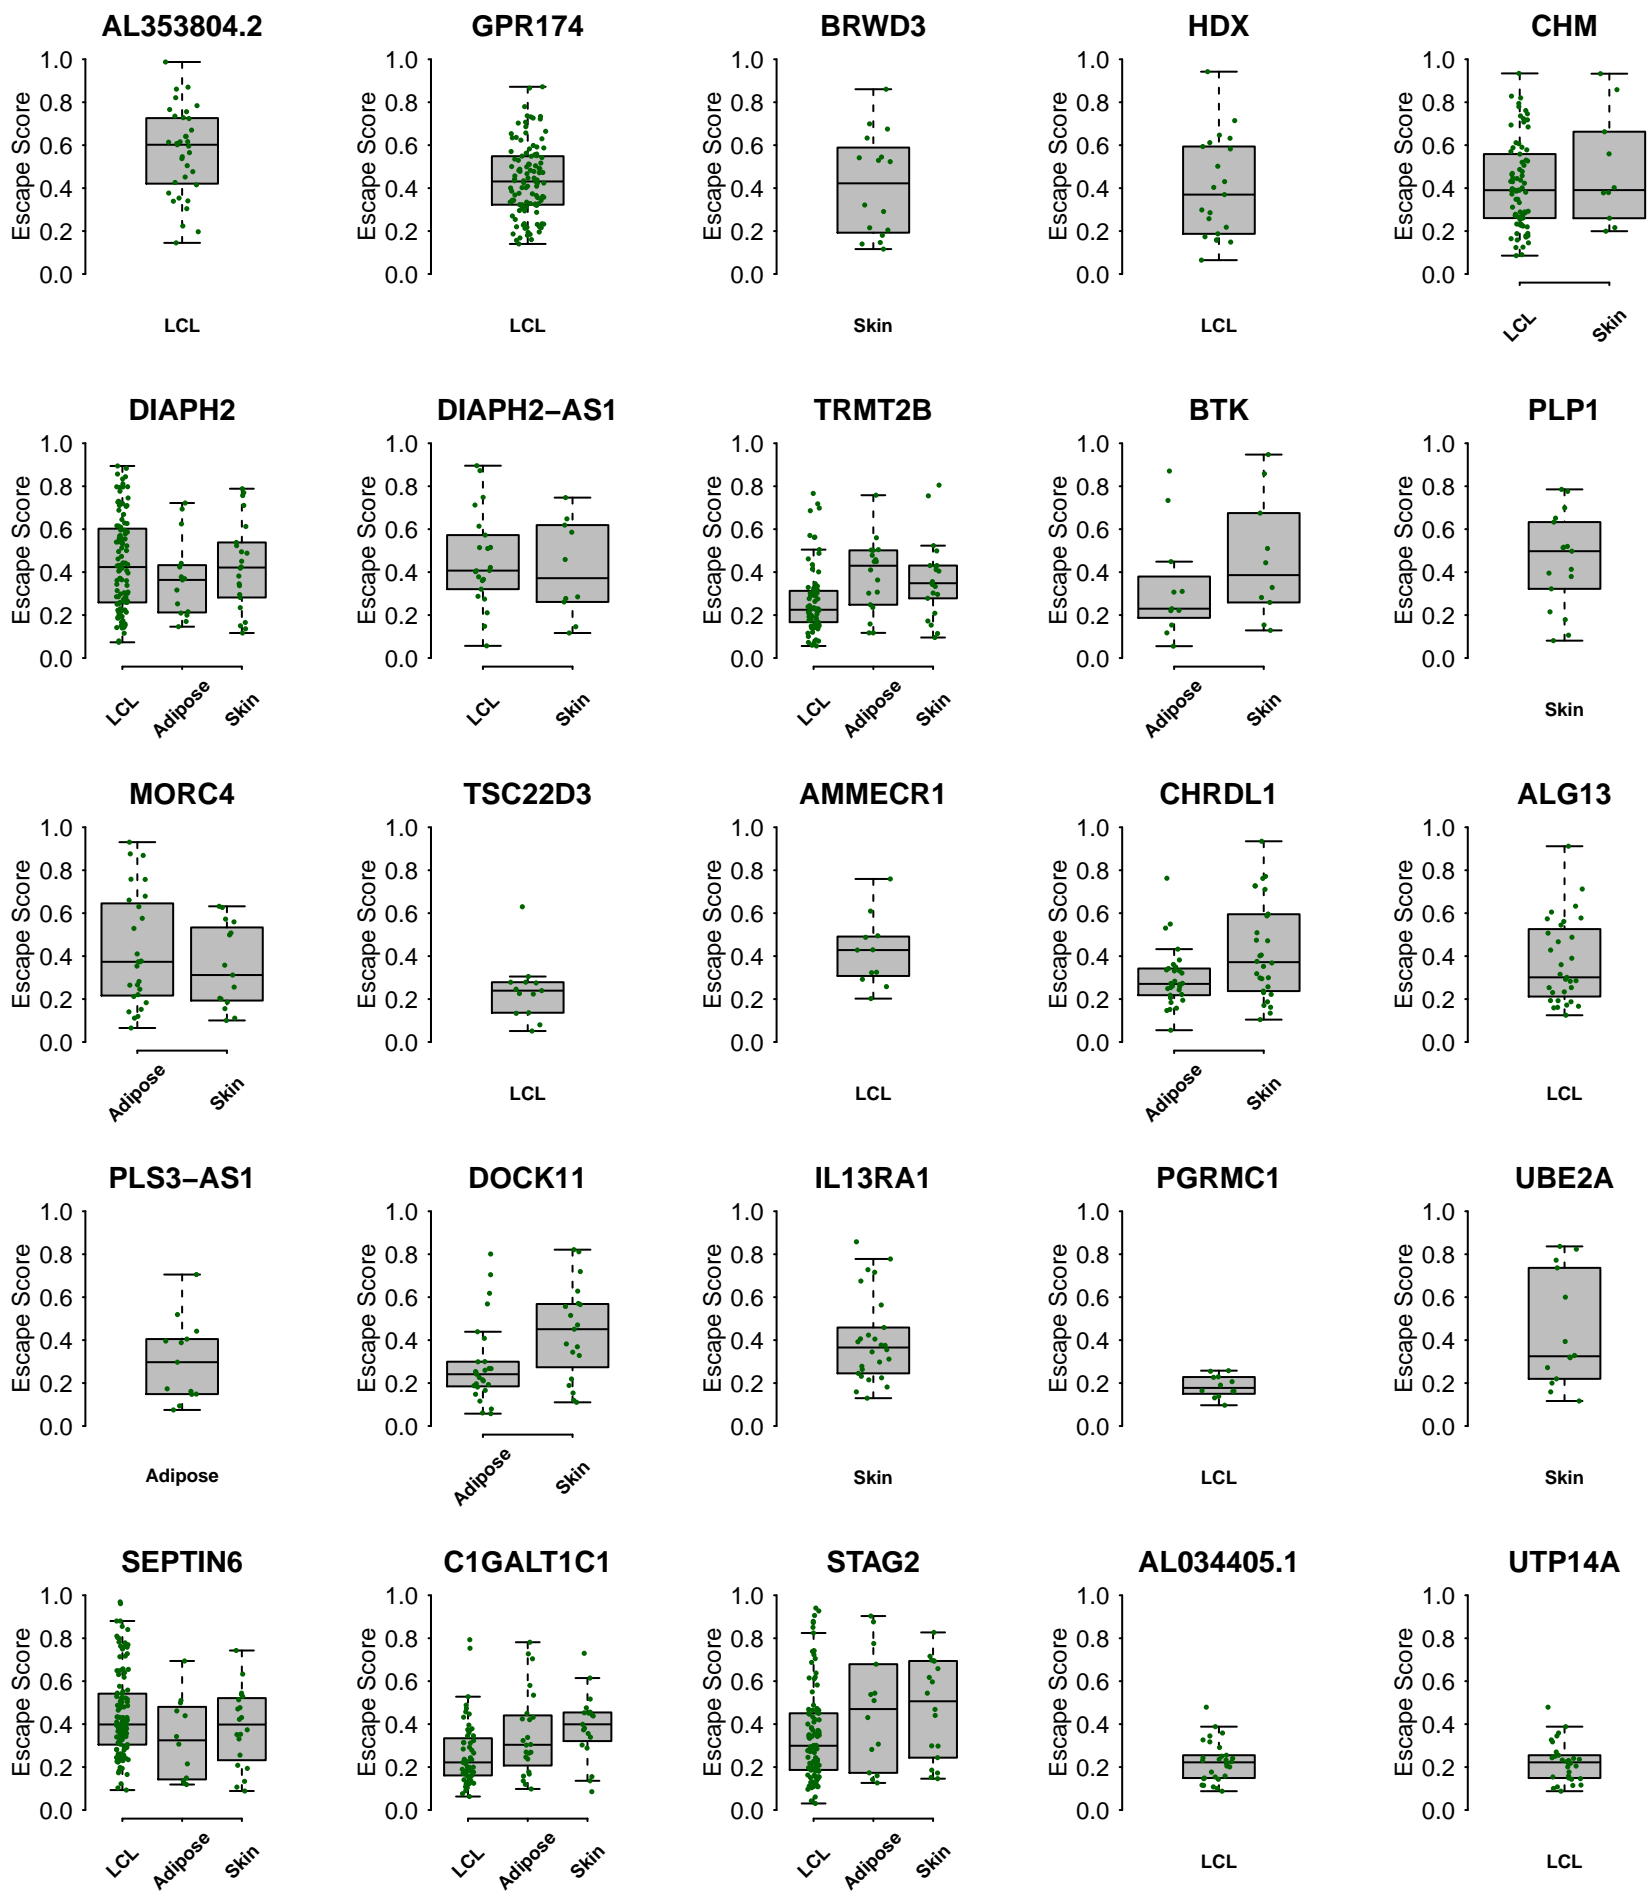

**RAP2C-AS1**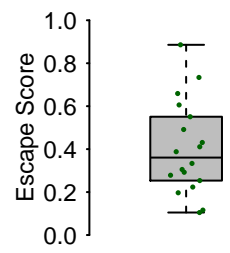

Adipose

**INTS6L**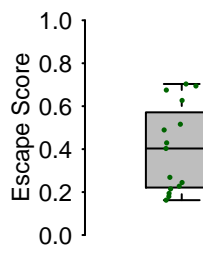

Skin

**CD99L2**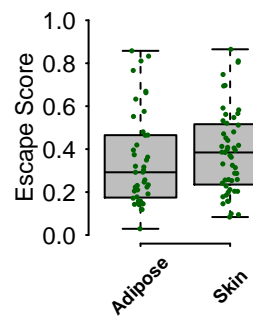

Adipose

Skin

**NSDHL**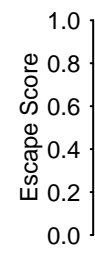

Skin

**ABCD1**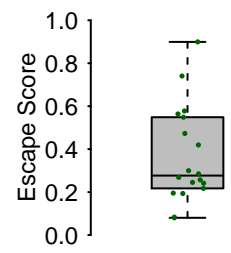

Adipose

**L1CAM**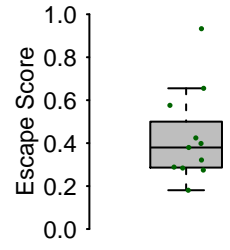

Skin

**DNASE1L1**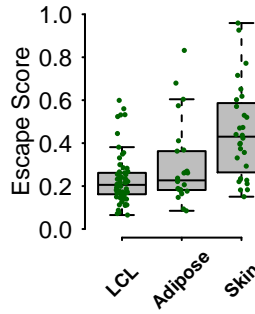

LCL

Adipose

Skin

**PLXNA3**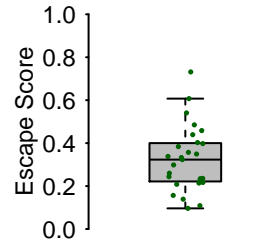

Skin

**UBL4A**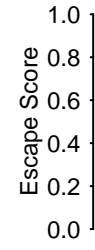

Skin

**FAM3A**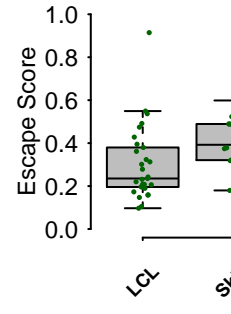

LCL

Skin

**GAB3**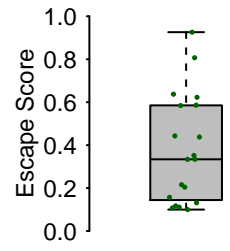

Adipose

**MPP1**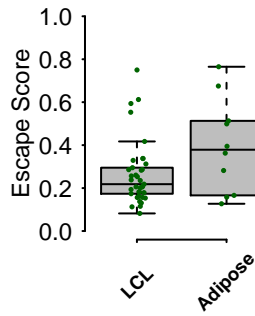

LCL

Adipose

**CLIC2**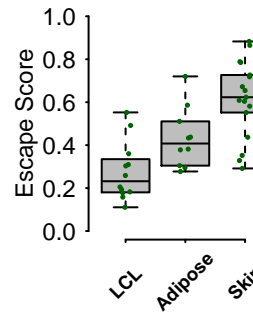

LCL

Adipose

Skin
